## ***Listeria monocytogenes* requires cellular respiration for NAD<sup>+</sup> regeneration and pathogenesis**

Rafael Rivera-Lugo,<sup>1,\*</sup> David Deng,<sup>1,\*</sup> Andrea Anaya-Sanchez<sup>2</sup>, Sara Tejedor-Sanz,<sup>3,4</sup> Valeria M Reyes Ruiz,<sup>5,6</sup> Hans B Smith,<sup>7</sup> Denis V Titov,<sup>1,8,9</sup> John-Demian Sauer,<sup>7</sup> Eric P Skaar,<sup>5,6</sup> Caroline M Ajo-Franklin,<sup>3,4</sup> Daniel A Portnoy,<sup>1,10</sup> Samuel H Light<sup>11,12</sup>

<sup>1</sup>Department of Molecular and Cell Biology, University of California, Berkeley, CA, USA

<sup>2</sup>Graduate Group in Microbiology, University of California, Berkeley, Berkeley, CA, USA

<sup>3</sup>Department of Biosciences, Rice University, Houston, TX, USA

<sup>4</sup>The Molecular Foundry, Lawrence Berkeley National Laboratory, Berkeley, CA, USA

<sup>5</sup>Department of Pathology, Microbiology, & Immunology, Vanderbilt University Medical Center, Nashville, TN, USA

<sup>6</sup>Vanderbilt Institute for Infection, Immunology, & Inflammation, Vanderbilt University Medical Center, Nashville, TN, USA

<sup>7</sup>Department of Medical Microbiology and Immunology, University of Wisconsin-Madison, Madison, WI, USA

<sup>8</sup>Department of Nutritional Sciences and Toxicology, University of California, Berkeley, CA, USA

<sup>9</sup>Center for Computational Biology, University of California, Berkeley, CA, USA

<sup>10</sup>Department of Plant and Microbial Biology, University of California, Berkeley, Berkeley, CA

<sup>11</sup>Duchossois Family Institute, University of Chicago, Chicago, IL, USA

<sup>12</sup>Department of Microbiology, University of Chicago, Chicago, IL, USA

\*These authors contributed equally

#Address correspondence to: [samlight@uchicago.edu](mailto:samlight@uchicago.edu)

### **Abstract**

Cellular respiration is essential for multiple bacterial pathogens and a validated antibiotic target. In addition to driving oxidative phosphorylation, bacterial respiration has a variety of ancillary functions that obscure its contribution to pathogenesis. We find here that the intracellular pathogen *Listeria monocytogenes* encodes two respiratory pathways which are partially functionally redundant and indispensable for pathogenesis. Loss of respiration decreased NAD<sup>+</sup> regeneration, but this could be specifically reversed by heterologous expression of a water-forming NADH oxidase (NOX). NOX expression fully rescued intracellular growth defects and increased *L. monocytogenes* loads >1,000-fold in a mouse infection model. Consistent with NAD<sup>+</sup> regeneration maintaining *L. monocytogenes* viability and enabling immune evasion, a respiration-deficient strain exhibited elevated bacteriolysis within the host cytosol and NOX rescued this phenotype. These studies show that NAD<sup>+</sup> regeneration, rather than oxidative phosphorylation, represents the primary role of *L. monocytogenes* respiration and highlight the nuanced relationship between bacterial metabolism, physiology, and pathogenesis.

### **Acknowledgments**

Research reported in this publication was supported by funding from the National Institutes of Health (T32GM007215 to H.B.S., R01AI137070 to J-D.S., R01AI073843 & R01AI073843 to E.P.S., 1P01AI063302 & 1R01AI27655 to D.A.P., and K22AI144031 to S.H.L), the National Academies of Sciences, Engineering, and Medicine (Ford Foundation Fellowship to R.R.-L), the University of California Dissertation-Year Fellowship (to R.R.-L), and the Searle Scholars Program (to S.H.L). V.M.R.R. holds a Postdoctoral Enrichment Program Award from the Burroughs Wellcome Fund and acknowledges support from the Academic Pathways Postdoctoral Fellowship at Vanderbilt University and the Howard Hughes Medical Institute Hanna H. Gray Fellows Program. Work at the Molecular Foundry was supported by the Office of Science, Office of Basic Energy Sciences, of the U.S. Department of Energy under Contract No. DE-AC02-05CH11231.

## 54 **Introduction**

55           Distinct metabolic strategies allow microbes to extract energy from diverse surroundings  
56 and colonize nearly every part of the earth. Microbial energy metabolisms vary greatly but can  
57 be generally categorized as possessing fermentative or respiratory properties. Cellular  
58 respiration is classically described by a multi-step process that initiates with the enzymatic  
59 oxidation of organic matter and the accompanying reduction of NAD<sup>+</sup> (nicotinamide adenine  
60 dinucleotide) to NADH. Respiration of fermentable sugars typically starts with glycolysis, which  
61 generates pyruvate and NADH. Pyruvate then enters the tricarboxylic acid (TCA) cycle, where  
62 its oxidation to carbon dioxide is coupled to the production of additional NADH. NADH  
63 generated by glycolysis and the TCA cycle is then oxidized by NADH dehydrogenase to  
64 regenerate NAD<sup>+</sup> and the resulting electrons are transferred via an electron transport chain to a  
65 terminal electron acceptor. While mammals strictly rely upon aerobic respiration, which uses  
66 oxygen as the terminal electron acceptor, microbes reside in diverse oxygen-limited  
67 environments and have varying and diverse capabilities to use disparate non-oxygen respiratory  
68 electron acceptors. Whatever the electron acceptor, electron transfer in the electron transport  
69 chain is coupled to proton pumping across the bacterial inner membrane. This generates a  
70 proton gradient or proton motive force, which powers a variety of processes, including ATP  
71 production by ATP synthase.

72           Respiratory pathways are important for several aspects of bacterial physiology.  
73 Respiration's role in establishing the proton motive force allows bacteria to generate ATP from  
74 non-fermentable energy sources (which are not amenable to ATP production by substrate-level  
75 phosphorylation) and increases ATP yields from fermentable energy sources. In addition to  
76 these roles in ATP production, the proton motive force is directly involved in many other aspects  
77 of bacterial physiology, including the regulation of cytosolic pH, transmembrane solute transport,  
78 ferredoxin-dependent metabolisms, protein secretion, and flagellar motility.<sup>1-6</sup> Beyond the proton  
79 motive force, respiration functions to regenerate NAD<sup>+</sup>, which is essential for enabling the

80 continued function of glycolysis and other metabolic processes. By obviating fermentative  
81 mechanisms of NAD<sup>+</sup> regeneration, respiration increases metabolic flexibility, which, among  
82 other metabolic consequences, can enhance ATP production by substrate-level  
83 phosphorylation.<sup>7</sup>

84 Bacterial pathogens reside within a host where they must employ fermentative or  
85 respiratory metabolisms to power growth. Pathogen respiratory processes have been linked to  
86 host-pathogen conflict in several contexts. Phagocytic cells target bacteria by producing reactive  
87 nitrogen species that inhibit aerobic respiration.<sup>8</sup> *Aggregatibacter actinomycetemcomitans*,  
88 *Salmonella enterica*, *Streptococcus agalactiae*, and *Staphylococcus aureus* mutants with  
89 impaired aerobic respiration are attenuated in murine models of systemic disease.<sup>9–12</sup> Aerobic  
90 respiration is vital for *Mycobacterium tuberculosis* pathogenesis and persister cell survival,  
91 making respiratory systems validated anti-tuberculosis drug targets.<sup>13,14</sup> Respiratory processes  
92 that use oxygen, tetrathionate, and nitrate as electron acceptors are important for the growth of  
93 *Salmonella enterica* and *Escherichia coli* in the mammalian intestinal lumen.<sup>15–17</sup> While several  
94 studies have linked respiration in bacterial pathogens to the use of specific electron donors (i.e.,  
95 non-fermentable energy sources) within the intestinal lumen, the particular respiratory functions  
96 important for systemic bacterial infections remain largely unexplained.<sup>18–22</sup>

97 *Listeria monocytogenes* is a human pathogen that, after being ingested on contaminated  
98 food, can gain access to the host cell cytosol and use actin-based motility to spread from cell-to-  
99 cell.<sup>23</sup> *L. monocytogenes* has two respiratory-like electron transport chains. One electron  
100 transport chain is dedicated to aerobic respiration and uses QoxAB (*aa<sub>3</sub>*) or CydAB (*bd*)  
101 cytochrome oxidases for terminal electron transfer to O<sub>2</sub> (**Fig 1a**).<sup>24</sup> We recently identified a  
102 second flavin-based electron transport chain that transfers electrons to extracytosolic acceptors  
103 (including ferric iron and fumarate) and can promote growth in anaerobic conditions (**Fig 1a**).<sup>25–</sup>

104 <sup>27</sup>

105           Despite lacking a complete TCA cycle, previous studies have shown that aerobic  
106 respiration is important for systemic spread of *L. monocytogenes*.<sup>24,28–30</sup> Saccharolytic microbes  
107 that similarly contain a respiratory electron transport chain but lack a complete TCA cycle can  
108 be considered to employ a respiro-fermentative metabolism.<sup>31</sup> Respiro-fermentative  
109 metabolisms tune the cell's fermentative output and often manifest with the respiratory  
110 regeneration of NAD<sup>+</sup> enabling a shift from the production of reduced (e.g., lactic acid and  
111 ethanol) to oxidized (e.g., acetic acid) fermentation products. In respiro-fermentative lactic acid  
112 bacteria that are closely related to *L. monocytogenes*, cellular respiration results in a modest  
113 growth enhancement, but is generally dispensable. The role of aerobic respiration for *L.*  
114 *monocytogenes* pathogenesis thus might be considered surprising and remains unclear.<sup>31,32</sup>

115           The studies presented here sought to address the role of respiration in *L.*  
116 *monocytogenes* pathogenesis. Our results confirm that *L. monocytogenes* exhibits a respiro-  
117 fermentative metabolism and show that its two respiratory systems are partially functionally  
118 redundant under aerobic conditions. We find that the respiration-deficient *L. monocytogenes*  
119 strains exhibit severely attenuated virulence and lyse within the cytosol of infected cells. Finally,  
120 we selectively abrogate the effect of diminished NAD<sup>+</sup> regeneration in respiration-deficient *L.*  
121 *monocytogenes* strains by heterologous expression of a water-forming NADH oxidase (NOX)  
122 and find that this restores virulence. These results thus elucidate the basis of *L. monocytogenes*  
123 cellular respiration and demonstrate that NAD<sup>+</sup> regeneration represents a key function of this  
124 activity in *L. monocytogenes* pathogenesis.

125

126

## 127 **Results**

128 ***L. monocytogenes*' electron transport chains have distinct roles in aerobic and anaerobic**  
129 **growth**

130 We selected previously characterized  $\Delta qoxA/\Delta cydAB$  and *fmnB::tn* *L. monocytogenes*  
131 strains to study the role of aerobic respiration and extracellular electron transfer,  
132 respectively.<sup>25,30</sup> In addition, we generated a  $\Delta qoxA/\Delta cydAB/fmnB::tn$  *L. monocytogenes* strain  
133 to test for functional redundancies of aerobic respiration and extracellular electron transfer.  
134 Initial studies measured the growth of these strains on nutritionally rich media (with glucose as  
135 the primary growth substrate) in the presence/absence of electron acceptors.

136 Compared to anaerobic conditions that lacked an electron acceptor, we found that  
137 aeration led to a relatively modest increase in growth of wildtype and *fmnB::tn* strains (**Fig.1b &**  
138 **c**). This growth enhancement could be attributed to aerobic respiration, as aerobic growth of the  
139  $\Delta qoxA/\Delta cydAB$  strain resembled anaerobically cultured strains (**Fig.1b & c**). Similarly, in  
140 anaerobic conditions, inclusion of the extracellular electron acceptor ferric iron resulted in a  
141 small growth enhancement of wildtype *L. monocytogenes* (**Fig.1d**). This phenotype could be  
142 attributed to extracellular electron transfer, as ferric iron failed to stimulate growth of the  
143 *fmnB::tn* strain (**Fig 1d**). These findings are consistent with aerobic respiration and extracellular  
144 electron transfer possessing distinct roles in aerobic and anaerobic environments, respectively.

145 The  $\Delta qoxA/\Delta cydAB/fmnB::tn$  strain exhibited the most striking growth pattern, since it  
146 lacked a phenotype under anaerobic conditions but had impaired aerobic growth, even relative  
147 to the  $\Delta qoxA/\Delta cydAB$  strain (**Fig 1b & 1c**). Notably,  $\Delta qoxA/\Delta cydAB/fmnB::tn$  was the sole strain  
148 tested with a substantially reduced growth rate in the presence of oxygen (**Fig 1b & 1c**). These  
149 observations suggest that aerobic extracellular electron transfer activity can partially  
150 compensate for the loss of aerobic respiration and that oxygen inhibits *L. monocytogenes*  
151 growth in the absence of both electron transport chains.

152

### 153 **Respiration alters *L. monocytogenes*' fermentative output**

154 Respiration is classically defined by the use of the TCA cycle to fully oxidize an electron  
155 donor (e.g., glucose) to carbon dioxide. However, *L. monocytogenes* lacks a TCA cycle and

156 instead converts sugars into multiple fermentation products.<sup>33</sup> We thus asked how respiration  
157 impacts *L. monocytogenes*' fermentative output. Under anaerobic conditions that lacked an  
158 alternative electron acceptor, *L. monocytogenes* exhibited a pattern of mixed acid fermentation,  
159 with lactic acid being most abundant and ethanol, formic acid, and acetic acid being produced at  
160 lower levels (**Fig 1e**). By contrast, under aerobic conditions *L. monocytogenes* almost  
161 exclusively produced acetic acid (**Fig 1e**). Consistent with respiration being partially responsible  
162 for the distinct aerobic vs. anaerobic responses,  $\Delta qoxA/\Delta cydAB$  and  $\Delta qoxA/\Delta cydAB/fmnB::tn$   
163 strains failed to undergo drastic shifts in fermentative output when grown in aerobic conditions.  
164 The  $\Delta qoxA/\Delta cydAB$  strain mainly produced lactic acid in the presence of oxygen and this trend  
165 was even more pronounced in the  $\Delta qoxA/\Delta cydAB/fmnB::tn$  strain, which almost exclusively  
166 produced lactic acid (**Fig 1e**). These results show that aerobic respiration induces a shift to  
167 acetic acid production and support the conclusion that *L. monocytogenes*' two electron transport  
168 chains are partially functionally redundant in aerobic conditions.

169 A comparison of fermentative outputs across the experimental conditions also clarifies  
170 the basis of central energy metabolism in *L. monocytogenes*. A classical glycolytic metabolism  
171 in *L. monocytogenes* likely generates ATP and NADH. In the absence of oxygen or an  
172 alternative electron acceptor, NAD<sup>+</sup> is regenerated by coupling NADH oxidation to the reduction  
173 of pyruvate to lactate or ethanol. In the presence of oxygen, NADH oxidation is coupled to the  
174 reduction of oxygen and pyruvate is converted to acetate. Moreover, the pattern of anaerobic  
175 formate production is consistent with aerobic acetyl-CoA production through pyruvate  
176 dehydrogenase and anaerobic production through pyruvate formate-lyase (**Fig 1f**). Collectively,  
177 these observations suggest that *L. monocytogenes* prioritizes balancing NAD<sup>+</sup>/NADH levels in  
178 the absence of an electron acceptor and maximizing ATP production in the presence of oxygen.  
179 In the absence of oxygen, NAD<sup>+</sup>/NADH redox homeostasis is achieved by minimizing NADH  
180 produced in acetyl-CoA biosynthesis and by consuming NADH in lactate/ethanol fermentation

181 **(Fig 1f)**. In the presence of oxygen, ATP yields are maximized through respiration and  
182 increased acetate kinase activity **(Fig 1f)**.

183

#### 184 **Respiratory capabilities are essential for *L. monocytogenes* pathogenesis**

185 We next asked about the role of cellular respiration in intracellular *L. monocytogenes*  
186 growth and pathogenesis. The *fmnB::tn* mutant deficient for extracellular electron transfer was  
187 previously shown to resemble the wildtype *L. monocytogenes* strain in a murine model of  
188 infection.<sup>25</sup> We found that this mutant also did not differ from wildtype *L. monocytogenes* in  
189 growth in bone marrow-derived macrophages and a plaque assay that monitors bacterial growth  
190 and cell-to-cell spread **(Fig 2a & 2b)**. Consistent with previous reports, the  $\Delta qoxA/\Delta cydAB$   
191 strain deficient for aerobic respiration was attenuated in the plaque assay and murine model of  
192 infection, but resembled wildtype *L. monocytogenes* in macrophage growth **(Fig 2a-2c)**.<sup>24,30</sup>  
193 Combining mutations that resulted in the loss of both extracellular electron transfer and aerobic  
194 respiration produced even more pronounced phenotypes. The  $\Delta qoxA/\Delta cydAB/fmnB::tn$  strain  
195 did not grow intracellularly in macrophages and fell below the limit of detection in the plaque  
196 assay and murine infection model **(Fig 2a-2c)**. These results thus demonstrate that respiratory  
197 activities are essential for *L. monocytogenes* virulence and that the organism's two respiratory  
198 pathways are partially functionally redundant within a mammalian host.

199

#### 200 **Expression of NOX restores NAD<sup>+</sup> levels in *L. monocytogenes* respiration mutants**

201 Cellular respiration both regenerates NAD<sup>+</sup> and establishes a proton motive force that is  
202 important for various aspects of bacterial physiology. The involvement of respiration in these  
203 two distinct processes can confound the analysis of respiration-impaired phenotypes. However,  
204 the heterologous expression of water-forming NADH oxidase (NOX) has been used to decouple  
205 these functionalities in mammalian cells **(Fig 3a)**.<sup>34</sup> Because NOX regenerates NAD<sup>+</sup> without  
206 pumping protons across the membrane, its introduction to a respiration-deficient cell can correct

207 an NAD<sup>+</sup>/NADH imbalance, thereby isolating the role of the proton motive force in the  
208 phenotype.<sup>34,35</sup>

209 To address which aspect of cellular respiration was important for *L. monocytogenes*  
210 pathogenesis, we introduced the previously characterized *Lactococcus lactis* water-forming  
211 NOX to the genome of respiration-deficient *L. monocytogenes* strains.<sup>36–38</sup> We confirmed that  
212 the  $\Delta qoxA/\Delta cydAB$  and  $\Delta qoxA/\Delta cydAB/fmnB::tn$  strains exhibited decreased NAD<sup>+</sup>/NADH ratios  
213 and that constitutive expression of NOX rescued this phenotype (**Fig 3b**). We also found that  
214 NOX expression restored the predominance of acetic acid production to the aerobically grown  
215  $\Delta qoxA/\Delta cydAB/fmnB::tn$  strain – confirming that the altered fermentative output of this  
216 respiration-deficient strain stems from impaired NAD<sup>+</sup> regeneration (**Fig 3c**). These experiments  
217 demonstrate that NOX can be used as a tool to manipulate the NAD<sup>+</sup>/NADH ratio in bacteria.

218

### 219 **Respiration is critical for regenerating NAD<sup>+</sup> during *L. monocytogenes* pathogenesis**

220 We next sought to dissect the relative importance of respiration in generating a proton  
221 motive force versus maintaining redox homeostasis for *L. monocytogenes* virulence. We tested  
222 NOX-expressing  $\Delta qoxA/\Delta cydAB$  and  $\Delta qoxA/\Delta cydAB/fmnB::tn$  strains for macrophage growth,  
223 plaque formation, and in the murine infection model. Expression of NOX almost fully rescued  
224 the plaque assay and macrophage growth phenotypes of the  $\Delta qoxA/\Delta cydAB$  and  
225  $\Delta qoxA/\Delta cydAB/fmnB::tn$  strains (**Fig 4a and 4b**). NOX expression also partially rescued *L.*  
226 *monocytogenes* virulence in the murine infection model (**Fig 4c**). Notably, NOX expression had  
227 a greater impact on the *L. monocytogenes* load in the spleen than the liver, suggesting distinct  
228 functions of respiration for *L. monocytogenes* colonization of these two organs (**Fig 4c**). These  
229 results are consistent with NAD<sup>+</sup> regeneration representing the primary role of respiration in *L.*  
230 *monocytogenes* pathogenesis to an organ-specific extent.

231



232 **Impaired redox homeostasis is associated with increased cytosolic *L. monocytogenes***  
233 **lysis**

234 We next asked why respiration-mediated redox homeostasis was critical for *L.*  
235 *monocytogenes* pathogenesis. We reasoned previous descriptions of *L. monocytogenes*  
236 quinone biosynthesis mutants might provide a clue. Quinones are a family of redox-active  
237 cofactors that have essential functions in respiratory electron transport chains.<sup>39</sup> Our previous  
238 studies suggested that distinct quinones function in flavin-based electron transfer and aerobic  
239 respiration<sup>25</sup>. A separate set of studies found that *L. monocytogenes* quinone biosynthesis  
240 mutants exhibited divergent phenotypes. *L. monocytogenes* strains defective in upstream steps  
241 of the quinone biosynthesis pathway exhibited increased bacteriolysis in the cytosol of host cells  
242 and were severely attenuated for virulence. By contrast, *L. monocytogenes* strains defective in  
243 downstream steps of the quinone biosynthesis pathway did not exhibit increased cytosolic  
244 bacteriolysis and had less severe virulence phenotypes<sup>30,40,41</sup>. These divergent phenotypic  
245 responses resemble the loss of aerobic respiration versus the loss of aerobic respiration *plus*  
246 flavin-based electron transfer observed in our studies. The distinct virulence phenotype of  
247 quinone biosynthesis mutants could thus be explained by the upstream portion of the quinone  
248 biosynthesis pathway being required for both aerobic respiration and flavin-based electron  
249 transfer, with the downstream portion of the pathway only being required for aerobic respiration  
250 **(Fig 5a)**.

251 Based on the proposed roles of quinones in respiration, we hypothesized that the severe  
252 phenotypes previously described for the upstream quinone biosynthesis mutants were due to an  
253 imbalance in the NAD<sup>+</sup>/NADH ratio. To address this hypothesis, we first confirmed that the  
254  $\Delta menB$  strain, which is defective in upstream quinone biosynthesis, exhibited a phenotype  
255 similar to the  $\Delta qoxA/\Delta cydAB/fmnB::tn$  strain for plaque formation and in the murine infection  
256 model **(Fig 5b and 5c)**. We next tested the effect of NOX expression on virulence phenotypes  
257 for the  $\Delta menB$  strain. NOX expression rescued  $\Delta menB$  phenotypes for plaque formation and in

258 the murine infection model to a strikingly similar extent as the  $\Delta qoxA/\Delta cydAB/fmnB::tn$  strain  
259 (**Fig 5b and 5c**). These results thus provide evidence that quinone biosynthesis is essential for  
260 respiration and that the severity of the  $\Delta menB$  phenotype is, in large part, to the role of  
261 respiration in regenerating NAD<sup>+</sup>.

262 Numerous adaptations allow *L. monocytogenes* to colonize the host cytosol, including a  
263 resistance to bacteriolysis. Minimizing bacteriolysis within the host cytosol is important to the  
264 pathogen because it can activate the host's innate immune responses, including pyroptosis, a  
265 form of programmed cell death, which severely reduces *L. monocytogenes* virulence.<sup>42</sup> *L.*  
266 *monocytogenes* strains deficient for the upstream quinone biosynthesis steps were previously  
267 identified as having an increased susceptibility to bacteriolysis in the macrophage cytosol.<sup>30</sup> We  
268 thus hypothesized that decreased virulence of respiration-deficient strains might relate to  
269 increased cytosolic bacteriolysis.

270 Using a previously described luciferase-based assay, we confirmed that the  $\Delta menB$   
271 strain exhibited increased intracellular bacteriolysis (**Fig 5d**).<sup>42</sup> We further found that NOX  
272 expression rescued  $\Delta menB$  bacteriolysis, but not a comparable bacteriolysis phenotype in a  
273  $\Delta glmR$  strain that was previously shown to result from unrelated deficiencies in cell wall  
274 biosynthesis (**Fig 5d**).<sup>52</sup> These studies thus show that efficient NAD<sup>+</sup> regeneration is essential  
275 for limiting cytosolic bacteriolysis and suggest a model whereby respiration-mediated NAD<sup>+</sup>  
276 regeneration promotes virulence, in part, by maintaining cell viability and facilitating evasion of  
277 innate immunity (**Fig 5e**).

278

## 279 **Discussion**

280 Cellular respiration is one of the most fundamental aspects of bacterial metabolism and  
281 a validated antibiotic target. Despite its importance, the role of cellular respiration in systemic  
282 bacterial pathogenesis has remained largely unexplained. The studies reported here address  
283 the basis of respiration in the pathogen *L. monocytogenes*, identifying two electron transport

284 chains that are partially functionally redundant and essential for pathogenesis. We find that  
285 restoring NAD<sup>+</sup> regeneration to respiration-deficient *L. monocytogenes* strains through the  
286 heterologous expression of NOX prevents bacteriolysis within the host cytosol and rescues  
287 pathogenesis. These findings thus support the conclusion that NAD<sup>+</sup> regeneration represents a  
288 primary role of *L. monocytogenes* respiration during pathogenesis.

289 Our results clarify several aspects of the basis and significance of energy metabolism in  
290 *L. monocytogenes*. In particular, our studies establish the relationship between *L.*  
291 *monocytogenes*' two electron transport chains – confirming previous observations that flavin-  
292 based electron transfer enhances anaerobic *L. monocytogenes* growth and revealing a novel  
293 aerobic function of this pathway<sup>25,27</sup>. While the benefit of flavin-based electron transfer was only  
294 apparent in the absence of aerobic respiration, identifying the substrates and functions of  
295 aerobic activation of this pathway may provide an interesting avenue for future studies.

296 Our studies further reveal that *L. monocytogenes* employs a respiro-fermentative  
297 metabolic strategy that is characterized by production of the reduced fermentation products  
298 lactate and ethanol in the absence of an electron acceptor and acetate when a respiratory  
299 pathway is activated. This respiro-fermentative metabolism is consistent with the proton motive  
300 force being less central to *L. monocytogenes* energy metabolism and with a primary role of  
301 respiration in energy metabolism being to unleash ATP production via acetate kinase catalyzed  
302 substrate-level phosphorylation (**Fig 1f**).

303 The importance of cellular respiration for non-proton motive force-related processes is  
304 further supported by observations about the ability of heterologous NOX overexpression to  
305 rescue the severe pathogenesis phenotypes of respiration-deficient *L. monocytogenes* strains.  
306 NOX expression fully rescued *in vitro* growth defects and partially rescued virulence in the  
307 mouse model of disease, suggesting that NAD<sup>+</sup> regeneration represents the sole function of  
308 respiration in some cell types and the major (but not sole) function of respiration in systemic  
309 disease. These findings suggest that a presently unaccounted for proton motive force-

310 dependent aspect of microbial physiology is likely important for systemic disease. Considering  
311 the promise of cellular respiration as an antibiotic target, these insights into the role respiration  
312 plays in pathogenesis may inform future drug development strategies.

313         The centrality of NAD<sup>+</sup> regeneration to *L. monocytogenes* also falls in line with relatively  
314 recent studies of mammalian respiration. Several studies have shown that the inability of  
315 respiration-deficient mammalian cells to regenerate NAD<sup>+</sup> impacts anabolic metabolisms and  
316 inhibits growth<sup>34,43–45</sup>. Our discovery of a similar role of respiration in a bacterial pathogen thus  
317 suggests that the importance of respiration for NAD<sup>+</sup> regeneration is a fundamental property  
318 conserved across the kingdoms of life.

319

## 320 **Methods**

### 321 **Bacterial culture and strains**

322         All strains of *L. monocytogenes* used in this study were derived from the wildtype  
323 10403S (streptomycin-resistant) strain (see **Table 1** for references and additional details). The  
324 *Lactococcus lactis* water-forming *nox* (NCBI accession WP\_010905313.1) was cloned into the  
325 pPL2 vector downstream of the constitutive P<sub>hyper</sub> promoter and integrated into the *L.*  
326 *monocytogenes* genome via conjugation, as previously described.<sup>46,47</sup> The  
327  $\Delta qoxA/\Delta cydAB/fmnB::tn$  strain was generated from  $\Delta qoxA/\Delta cydAB$  and *fmnB::tn* strains using  
328 generalized transduction protocols with phage U153, as previously described.<sup>48,49</sup>

329         *L. monocytogenes* cells were grown at 37°C in filter-sterilized brain heart infusion (BHI)  
330 media. Growth curves were spectrophotometrically measured by optical density at a wavelength  
331 of 600 nm (OD<sub>600</sub>). An anaerobic chamber (Coy Laboratory Products) with an environment of  
332 2% H<sub>2</sub> balanced in N<sub>2</sub> was used for anaerobic experiments. Media was supplemented with 50  
333 mM ferric ammonium citrate or 50 mM fumarate for experiments that addressed the effect of  
334 electron acceptors on *L. monocytogenes* growth.

335

336 **Plaque assays**

337 *L. monocytogenes* strains were grown overnight slanted at 30°C and were diluted in  
338 sterile phosphate-buffered saline (PBS). Six-well plates containing  $1.2 \times 10^6$  mouse L2 fibroblast  
339 cells per well were infected with the *L. monocytogenes* strains at a multiplicity of infection (MOI)  
340 of approximately 0.1. One hour post-infection, the L2 cells were washed with PBS and overlaid  
341 with Dulbecco's Modified Eagle Medium (DMEM) containing 0.7% agarose and gentamicin (10  
342  $\mu\text{g}/\text{mL}$ ) to kill extracellular bacteria, and then plates were incubated at 37°C with 5%  $\text{CO}_2$ . 72  
343 hours post-infection, L2 cells were overlaid with a staining mixture containing DMEM, 0.7%  
344 agarose, neutral red (Sigma), and gentamicin (10  $\mu\text{g}/\text{mL}$ ) and plaques were scanned and  
345 analyzed using ImageJ, as previously described.<sup>49,50</sup>

346

347 **Intracellular macrophage growth curves**

348 *L. monocytogenes* strains were grown overnight slanted at 30°C and were diluted in  
349 sterile PBS.  $3 \times 10^6$  bone marrow-derived macrophages (BMMs) from C57BL/6 mice were  
350 seeded in 60 mm non-TC treated dishes containing 14 12 mm glass coverslips in each dish and  
351 infected with an MOI of 0.25 as previously described.<sup>49,51</sup>

352

353 **Mouse virulence experiments**

354 *L. monocytogenes* strains were grown at 37°C with shaking at 200 r.p.m. to mid-  
355 logarithmic phase. Bacteria were collected and washed in PBS and resuspended at a  
356 concentration of  $5 \times 10^5$  colony-forming units (CFU) per 200  $\mu\text{L}$  of sterile PBS. Eight-week-old  
357 female CD-1 mice (Charles River) were then injected with  $1 \times 10^5$  CFU via the tail vein. 48 hours  
358 post-infection, spleens and livers were collected, homogenized, and plated to determine the  
359 number of CFU per organ.

360

361 **NAD<sup>+</sup>/NADH assay**

362 *L. monocytogenes* strains were grown at 37°C with shaking at 200 r.p.m. to mid-  
363 logarithmic phase. Cultures were centrifuged and then resuspended in PBS. Resuspended  
364 bacteria were then lysed by vortexing with 0.1-mm-diameter zirconia–silica beads for 10  
365 minutes. Lysates were used to measure NAD<sup>+</sup> and NADH levels using the NAD/NADH-Glo  
366 Assay (Promega, G9071) by following the manufacturer's protocol.

367

### 368 **Fermentation product measurements**

369 Organic acids and ethanol were measured by high-performance liquid chromatography  
370 (Agilent, 1260 Infinity), using a standard analytical system (Shimadzu, Kyoto, Japan) equipped  
371 with an Aminex Organic Acid Analysis column (Bio-Rad, HPX-87H 300 x 7.8 mm) heated at 60°  
372 C. The eluent was 5 mM of sulfuric acid, used at a flow rate of 0.6 mL/minute. We used a  
373 refractive index detector 1260 Infinity II RID and a 1260 Infinity II Variable Wavelength Detector  
374 (VWD). A five-point calibration curve based on peak area was generated and used to calculate  
375 concentrations in the unknown samples.

376

### 377 **Intracellular bacteriolysis assay**

378 Bacteriolysis assays were performed as previously described.<sup>30</sup> Briefly, immortalized  
379 *Ifnar*<sup>-/-</sup> macrophages were plated at a concentration of 5 x 10<sup>5</sup> cells per well in a 24-well plate.  
380 Cultures of *L. monocytogenes* strains were grown overnight slanted at 30°C and diluted to a  
381 final concentration of 5 x 10<sup>8</sup> CFU per mL. Diluted cultures were then used to infect  
382 macrophages at an MOI of 10. At one hour post-infection, wells were aspirated and the media  
383 was replaced with media containing 50 µg/mL gentamicin. At six hours post-infection, media  
384 was aspirated and macrophages were lysed using TNT lysis buffer (20 mM Tris, 200 mM NaCl,  
385 1% Triton [pH 8.0]). Lysate was then transferred to 96-well plates and assayed for luciferase  
386 activity by luminometer (Synergy HT; BioTek, Winooski, VT).

387

388

389 **References**

- 390 1. Driessen, A. J. M. & Nouwen, N. Protein translocation across the bacterial cytoplasmic  
391 membrane. *Annu. Rev. Biochem.* **77**, 643–667 (2008).
- 392 2. Driessen, A. J., Rosen, B. P. & Konings, W. N. Diversity of transport mechanisms: common  
393 structural principles. *Trends Biochem. Sci.* **25**, 397–401 (2000).
- 394 3. Slonczewski, J. L., Fujisawa, M., Dopson, M. & Krulwich, T. A. Cytoplasmic pH  
395 measurement and homeostasis in bacteria and archaea. *Adv. Microb. Physiol.* **55**, 1–79,  
396 317 (2009).
- 397 4. Tremblay, P.-L., Zhang, T., Dar, S. A., Leang, C. & Lovley, D. R. The Rnf complex of  
398 *Clostridium ljungdahlii* is a proton-translocating ferredoxin:NAD<sup>+</sup> oxidoreductase essential  
399 for autotrophic growth. *MBio* **4**, e00406–12 (2012).
- 400 5. Wilharm, G. *et al.* *Yersinia enterocolitica* type III secretion depends on the proton motive  
401 force but not on the flagellar motor components MotA and MotB. *Infect. Immun.* **72**, 4004–  
402 4009 (2004).
- 403 6. Manson, M. D., Tedesco, P., Berg, H. C., Harold, F. M. & Van der Drift, C. A protonmotive  
404 force drives bacterial flagella. *Proc. Natl. Acad. Sci. U. S. A.* **74**, 3060–3064 (1977).
- 405 7. Hunt, K. A., Flynn, J. M., Naranjo, B., Shikhare, I. D. & Gralnick, J. A. Substrate-level  
406 phosphorylation is the primary source of energy conservation during anaerobic respiration  
407 of *Shewanella oneidensis* strain MR-1. *J. Bacteriol.* **192**, 3345–3351 (2010).
- 408 8. Richardson, A. R., Libby, S. J. & Fang, F. C. A nitric oxide-inducible lactate dehydrogenase  
409 enables *Staphylococcus aureus* to resist innate immunity. *Science* **319**, 1672–1676 (2008).
- 410 9. Lewin, G. R., Stacy, A., Michie, K. L., Lamont, R. J. & Whiteley, M. Large-scale  
411 identification of pathogen essential genes during coinfection with sympatric and allopatric  
412 microbes. *Proceedings of the National Academy of Sciences* **116**, 19685–19694 (2019).
- 413 10. Craig, M., Sadik, A. Y., Golubeva, Y. A., Tidhar, A. & Slauch, J. M. Twin-arginine  
414 translocation system (tat) mutants of *Salmonella* are attenuated due to envelope defects,  
415 not respiratory defects. *Mol. Microbiol.* **89**, 887–902 (2013).
- 416 11. Lencina, A. M. *et al.* Type 2 NADH Dehydrogenase Is the Only Point of Entry for Electrons  
417 into the *Streptococcus agalactiae* Respiratory Chain and Is a Potential Drug Target. *MBio*  
418 **9**, 1–15 (2018).
- 419 12. Hammer, N. D. *et al.* Two heme-dependent terminal oxidases power *Staphylococcus*  
420 *aureus* organ-specific colonization of the vertebrate host. *MBio* **4**, 1–9 (2013).
- 421 13. Cook, G. M., Greening, C., Hards, K. & Berney, M. Energetics of pathogenic bacteria and  
422 opportunities for drug development. *Adv. Microb. Physiol.* **65**, 1–62 (2014).
- 423 14. Hasenoehrl, E. J., Wiggins, T. J. & Berney, M. Bioenergetic Inhibitors: Antibiotic Efficacy  
424 and Mechanisms of Action in *Mycobacterium tuberculosis*. *Front. Cell. Infect. Microbiol.* **10**,  
425 611683 (2020).
- 426 15. Winter, S. E. *et al.* Gut inflammation provides a respiratory electron acceptor for  
427 *Salmonella*. *Nature* **467**, 426–429 (2010).
- 428 16. Winter, S. E. *et al.* Host-derived nitrate boosts growth of *E. coli* in the inflamed gut. *Science*  
429 **339**, 708–711 (2013).
- 430 17. Rivera-Chávez, F. *et al.* Depletion of Butyrate-Producing Clostridia from the Gut Microbiota  
431 Drives an Aerobic Luminal Expansion of *Salmonella*. *Cell Host Microbe* **19**, 443–454  
432 (2016).
- 433 18. Gillis, C. C. *et al.* Dysbiosis-Associated Change in Host Metabolism Generates Lactate to  
434 Support *Salmonella* Growth. *Cell Host Microbe* **23**, 570 (2018).
- 435 19. Ali, M. M. *et al.* Fructose-asparagine is a primary nutrient during growth of *Salmonella* in the  
436 inflamed intestine. *PLoS Pathog.* **10**, e1004209 (2014).
- 437 20. Faber, F. *et al.* Respiration of Microbiota-Derived 1,2-propanediol Drives *Salmonella*  
438 Expansion during Colitis. *PLoS Pathog.* **13**, e1006129 (2017).

- 439 21. Thiennimitr, P. *et al.* Intestinal inflammation allows Salmonella to use ethanolamine to  
440 compete with the microbiota. *Proc. Natl. Acad. Sci. U. S. A.* **108**, 17480–17485 (2011).
- 441 22. Spiga, L. *et al.* An Oxidative Central Metabolism Enables Salmonella to Utilize Microbiota-  
442 Derived Succinate. *Cell Host Microbe* (2017) doi:10.1016/j.chom.2017.07.018.
- 443 23. Freitag, N. E., Port, G. C. & Miner, M. D. Listeria monocytogenes — from saprophyte to  
444 intracellular pathogen. *Nat. Rev. Microbiol.* **7**, 623–628 (2009).
- 445 24. Corbett, D. *et al.* Listeria monocytogenes has both cytochrome bd-type and cytochrome  
446 aa3-type terminal oxidases, which allow growth at different oxygen levels, and both are  
447 important in infection. *Infect. Immun.* **85**, (2017).
- 448 25. Light, S. H. *et al.* A flavin-based extracellular electron transfer mechanism in diverse Gram-  
449 positive bacteria. *Nature* **562**, 140–157 (2018).
- 450 26. Light, S. H. *et al.* Extracellular electron transfer powers flavinylated extracellular reductases  
451 in Gram-positive bacteria. *Proc. Natl. Acad. Sci. U. S. A.* **116**, 26892–26899 (2019).
- 452 27. Zeng, Z. *et al.* Bacterial Microcompartments Coupled with Extracellular Electron Transfer  
453 Drive the Anaerobic Utilization of Ethanolamine in Listeria monocytogenes. *mSystems* **6**,  
454 (2021).
- 455 28. Trivett, T. L. & Meyer, E. A. Citrate cycle and related metabolism of Listeria  
456 monocytogenes. *J. Bacteriol.* **107**, 770–779 (1971).
- 457 29. Stritzker, J. *et al.* Growth, virulence, and immunogenicity of Listeria monocytogenes aro  
458 mutants. *Infect. Immun.* (2004) doi:10.1128/IAI.72.10.5622-5629.2004.
- 459 30. Chen, G. Y., McDougal, C. E., D’Antonio, M. A., Portman, J. L. & Sauer, J. D. A genetic  
460 screen reveals that synthesis of 1,4-dihydroxy-2-naphthoate (DHNA), but not full-length  
461 menaquinone, is required for Listeria monocytogenes cytosolic survival. *MBio* **8**, (2017).
- 462 31. Pedersen, M. B., Gaudu, P., Lechardeur, D., Petit, M.-A. & Gruss, A. Aerobic Respiration  
463 Metabolism in Lactic Acid Bacteria and Uses in Biotechnology. *Annu. Rev. Food Sci.*  
464 *Technol.* **3**, 37–58 (2012).
- 465 32. Duwat, P. *et al.* Respiration capacity of the fermenting bacterium Lactococcus lactis and its  
466 positive effects on growth and survival. *J. Bacteriol.* **183**, 4509–4516 (2001).
- 467 33. Romick, T. L., Fleming, H. P. & Mcfeeters, R. F. Aerobic and anaerobic metabolism of  
468 Listeria monocytogenes in defined glucose medium. *Appl. Environ. Microbiol.* **62**, 304–307  
469 (1996).
- 470 34. Titov, D. V. *et al.* Complementation of mitochondrial electron transport chain by  
471 manipulation of the NAD<sup>+</sup>/NADH ratio. *Science* (2016) doi:10.1126/science.aad4017.
- 472 35. Lopez de Felipe, F., Kleerebezem, M., de Vos, W. M. & Hugenholtz, J. Cofactor  
473 engineering: a novel approach to metabolic engineering in Lactococcus lactis by controlled  
474 expression of NADH oxidase. *J. Bacteriol.* **180**, 3804–3808 (1998).
- 475 36. Neves, A. R. *et al.* Is the Glycolytic Flux in Lactococcus lactis Primarily Controlled by the  
476 Redox Charge?: KINETICS OF NAD<sup>+</sup> AND NADH POOLS DETERMINED IN VIVO BY <sup>13</sup>C  
477 NMR\*210. *J. Biol. Chem.* **277**, 28088–28098 (2002).
- 478 37. Neves, A. R. *et al.* Effect of different NADH oxidase levels on glucose metabolism by  
479 Lactococcus lactis: kinetics of intracellular metabolite pools determined by in vivo nuclear  
480 magnetic resonance. *Appl. Environ. Microbiol.* **68**, 6332–6342 (2002).
- 481 38. Heux, S., Cachon, R. & Dequin, S. Cofactor engineering in Saccharomyces cerevisiae:  
482 Expression of a H<sub>2</sub>O-forming NADH oxidase and impact on redox metabolism. *Metab. Eng.*  
483 **8**, 303–314 (2006).
- 484 39. Collins, M. D. & Jones, D. Distribution of isoprenoid quinone structural types in bacteria and  
485 their taxonomic implication. *Microbiol. Rev.* **45**, 316–354 (1981).
- 486 40. Chen, G. Y. *et al.* Mutation of the transcriptional regulator ytoi rescues listeria  
487 monocytogenes mutants deficient in the essential shared metabolite 1,4-dihydroxy-2-  
488 naphthoate (DHNA). *Infect. Immun.* **88**, (2020).
- 489 41. Smith, H. B. *et al.* Listeria monocytogenes MenI encodes a DHNA-CoA thioesterase



- 490 necessary for menaquinone biosynthesis, cytosolic survival, and virulence. *Infect. Immun.*  
491 (2021) doi:10.1128/IAI.00792-20.
- 492 42. Sauer, J.-D. *et al.* Listeria monocytogenes triggers AIM2-mediated pyroptosis upon  
493 infrequent bacteriolysis in the macrophage cytosol. *Cell Host Microbe* **7**, 412–419 (2010).
- 494 43. Sullivan, L. B. *et al.* Supporting Aspartate Biosynthesis Is an Essential Function of  
495 Respiration in Proliferating Cells. *Cell* **162**, 552–563 (2015).
- 496 44. Birsoy, K. *et al.* An Essential Role of the Mitochondrial Electron Transport Chain in Cell  
497 Proliferation Is to Enable Aspartate Synthesis. *Cell* **162**, 540–551 (2015).
- 498 45. Li, Z. *et al.* Cancer cells depend on environmental lipids for proliferation when electron  
499 acceptors are limited. *bioRxiv* 2020.06.08.134890 (2020) doi:10.1101/2020.06.08.134890.
- 500 46. Lauer, P., Chow, M. Y. N., Loessner, M. J., Portnoy, D. A. & Calendar, R. Construction,  
501 characterization, and use of two Listeria monocytogenes site-specific phage integration  
502 vectors. *J. Bacteriol.* (2002) doi:10.1128/JB.184.15.4177-4186.2002.
- 503 47. Shen, A. & Higgins, D. E. The 5' untranslated region-mediated enhancement of intracellular  
504 listeriolysin O production is required for Listeria monocytogenes pathogenicity. *Mol.*  
505 *Microbiol.* **57**, 1460–1473 (2005).
- 506 48. Hodgson, D. A. Generalized transduction of serotype 1/2 and serotype 4b strains of Listeria  
507 monocytogenes. *Mol. Microbiol.* **35**, 312–323 (2000).
- 508 49. Reniere, M. L., Whiteley, A. T. & Portnoy, D. A. An In Vivo Selection Identifies Listeria  
509 monocytogenes Genes Required to Sense the Intracellular Environment and Activate  
510 Virulence Factor Expression. *PLoS Pathog.* **12**, 1–27 (2016).
- 511 50. Sun, A. N., Camilli, A. & Portnoy, D. A. Isolation of Listeria monocytogenes small-plaque  
512 mutants defective for intracellular growth and cell-to-cell spread. *Infect. Immun.* **58**, 3770–  
513 3778 (1990).
- 514 51. Portnoy, D. A. Role of hemolysin for the intracellular growth of Listeria monocytogenes. *J.*  
515 *Exp. Med.* **167**, 1459–1471 (1988).
- 516 52. Pensinger, D. *et al.* Listeria monocytogenes GImR is an accessory uridyltransferase  
517 essential for cytosolic survival and virulence. *bioRxiv* 2021.10.27.466214 (2021).  
518 doi:10.1101/2021.10.27.466214  
519

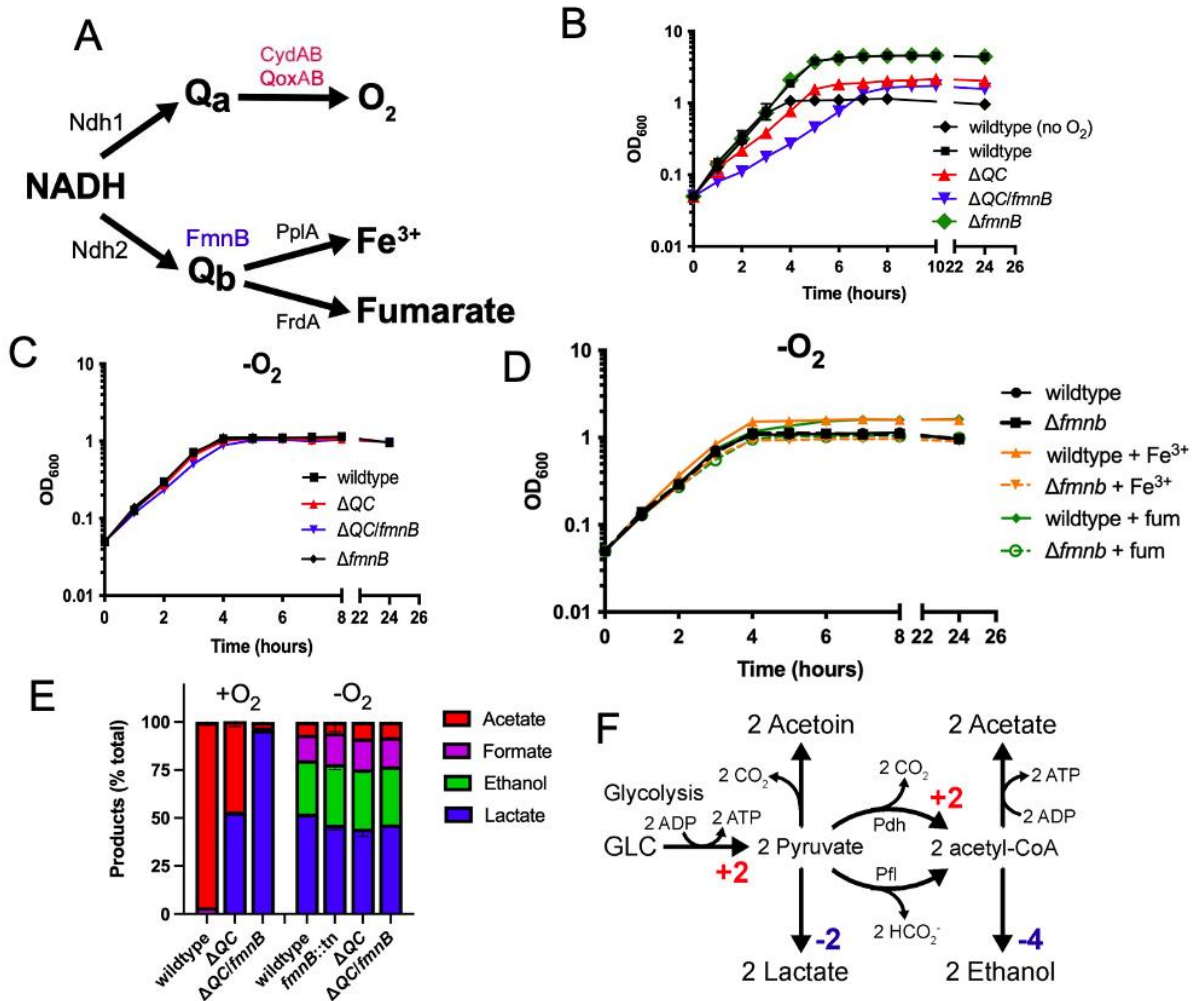

520  
521  
522 **Figure 1. Respiration impacts *L. monocytogenes* growth and fermentative output.** (A)  
523 Proposed respiratory electron transport chains in *L. monocytogenes*. Different NADH  
524 dehydrogenases likely transfer electrons to distinct but presently unidentified quinones (Q<sub>a</sub> and  
525 Q<sub>b</sub>). FmnB catalyzes assembly of essential components of the electron transport chain, PplA  
526 and FrdA, that can transfer electrons to ferric iron and fumarate, respectively. Other proteins  
527 involved in the terminal electron transfer steps are noted. (B) Optical density of *L.*  
528 *monocytogenes* strains aerobically grown in nutrient-rich media, with the anaerobically grown  
529 wildtype strain provided for context. The means and standard deviations from three independent  
530 experiments are shown. (C) Optical density of *L. monocytogenes* strains grown anaerobically in  
531 nutrient-rich media. The data represent the means and standard deviations from three  
532 independent experiments. (D) Optical density of anaerobically grown strains in nutrient-rich  
533 media supplemented with the alternative electron acceptors ferric iron (Fe<sup>3+</sup>) or fumarate (fum),  
534 as indicated. The means and standard deviations from three independent experiments are  
535 shown. (E) Fermentation products of *L. monocytogenes* strains grown in nutrient-rich media  
536 under aerobic and anaerobic conditions. Error bars show standard deviations. Results from  
537 three independent experiments are shown. (F) Proposed pathways for *L. monocytogenes* sugar  
538 metabolism. The predicted number of NADH generated (+) or consumed (-) in each step is  
539 indicated. PplA, peptide pheromone-encoding lipoprotein A; FrdA, fumarate reductase A; ΔQC,  
540 Δ*qoxA*/Δ*cydAB*; Δ*QC/fmnB*, Δ*qoxA*/Δ*cydAB/fmnB*::tn; GLC, glucose; Pdh, pyruvate  
541 dehydrogenase; Pfl, pyruvate formate-lyase.

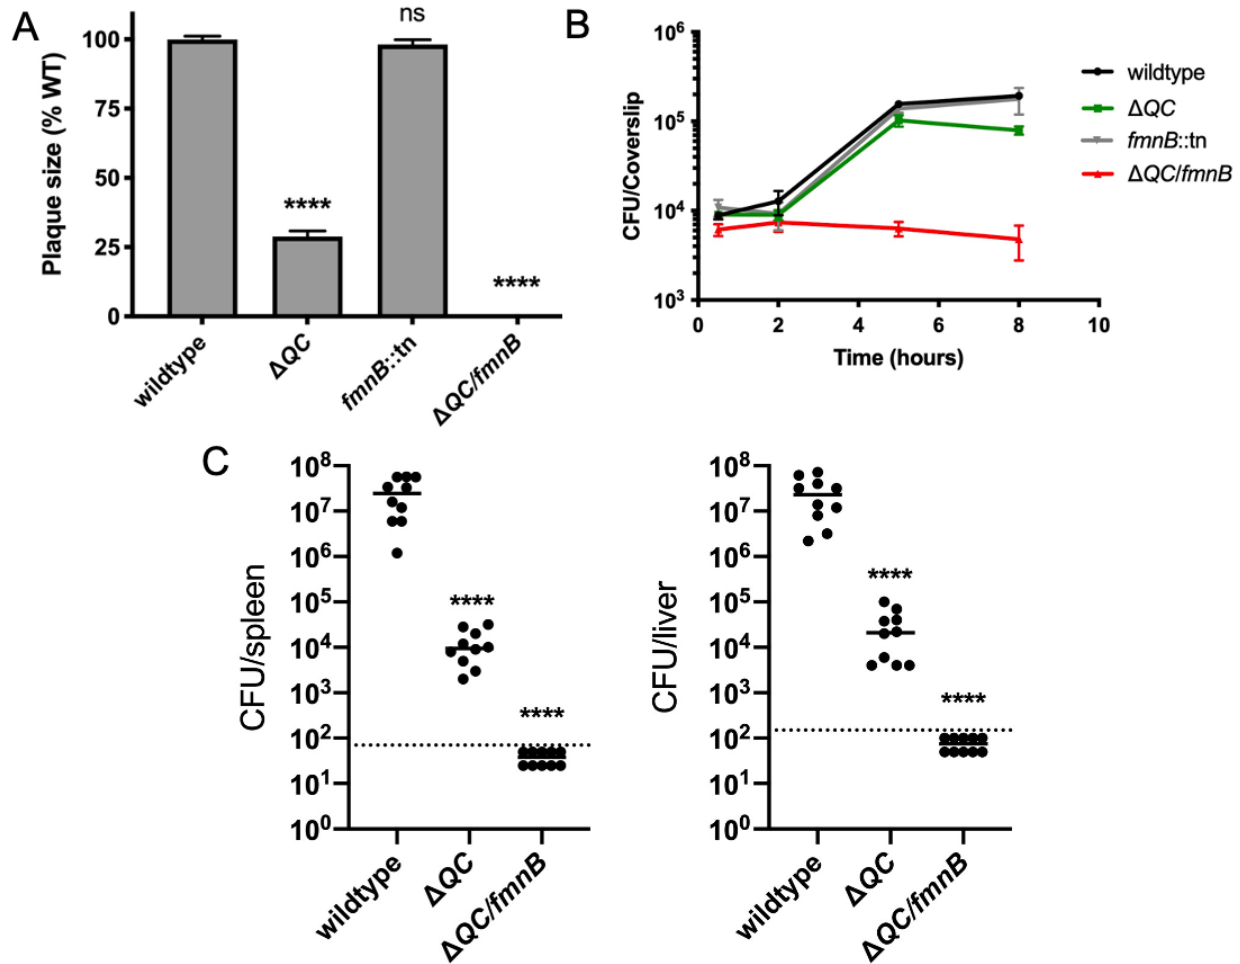

542  
 543 **Figure 2. Respiration is required for *L. monocytogenes* virulence.** (A) Plaque formation by  
 544 cell-to-cell spread of *L. monocytogenes* strains in monolayers of mouse L2 fibroblast cells. The  
 545 mean plaque size of each strain is shown as a percentage relative to the wildtype plaque size.  
 546 Error bars represent standard deviations of the mean plaque size from two independent  
 547 experiments. Statistical analysis was performed using one-way ANOVA and Dunnett's post-test  
 548 comparing wildtype to all the other strains. \*\*\*\*,  $P < 0.0001$ ; ns, no significant difference ( $P >$   
 549  $0.05$ ). (B) Intracellular growth of *L. monocytogenes* strains in murine bone marrow-derived  
 550 macrophages (BMMs). One hour post-infection, infected BMMs were treated with 50  $\mu\text{g}/\text{mL}$  of  
 551 gentamicin to kill extracellular bacteria. Colony forming units (CFU) were enumerated at the  
 552 indicated times. Results are representative of two independent experiments. (C) Bacterial  
 553 burdens in murine spleens and livers 48 hours post-intravenous infection with indicated *L.*  
 554 *monocytogenes* strains. The median values of the CFUs are denoted by black bars. The dashed  
 555 lines represent the limit of detection. Data were combined from two independent experiments,  $n$   
 556 = 10 mice per strain. Statistical significance was evaluated using one-way ANOVA and  
 557 Dunnett's post-test using wildtype as the control. \*\*\*\*,  $P < 0.0001$ .  $\Delta\text{QC}$ ,  $\Delta\text{qoxA}/\Delta\text{cydAB}$ ;  
 558  $\Delta\text{QC}/\text{fmnB}$ ,  $\Delta\text{qoxA}/\Delta\text{cydAB}/\text{fmnB}::\text{tn}$ .  
 559

560

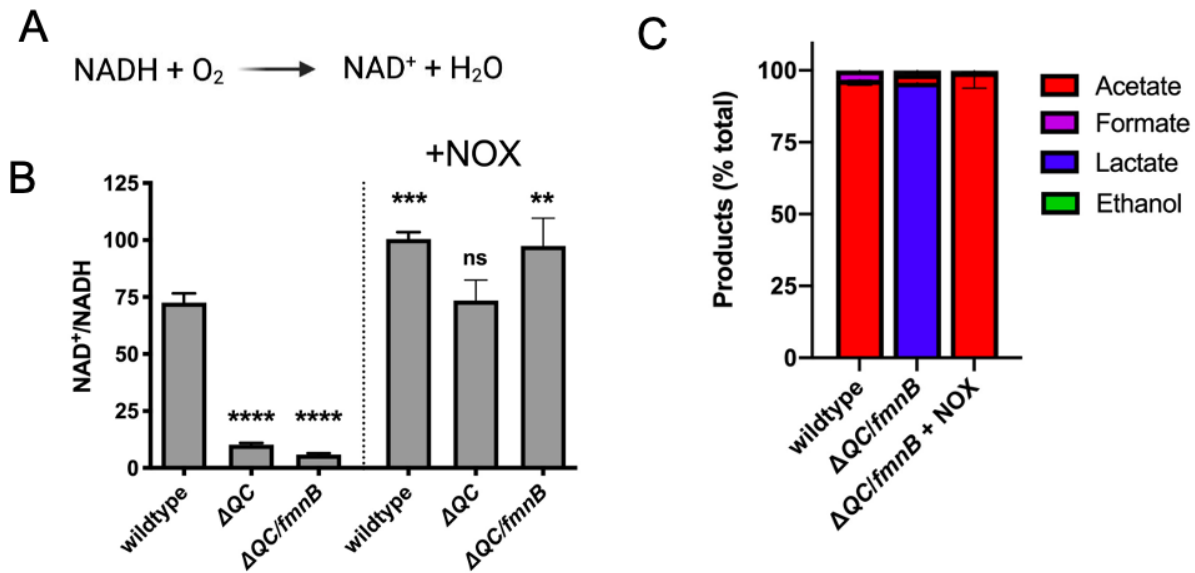

561  
562 **Figure 3. Water-forming NADH oxidase (NOX) restores redox homeostasis in respiration-**  
563 **deficient *L. monocytogenes* strains.** (A) Reaction catalyzed by the *Lactococcus lactis* water-  
564 forming NOX, which is the same as aerobic respiration without the generation of a proton motive  
565 force. (B) NAD<sup>+</sup>/NADH ratios of parent and NOX-complemented *L. monocytogenes* strains  
566 grown aerobically in nutrient-rich media to mid-logarithmic phase. Results from three  
567 independent experiments are presented as means and standard deviations. Statistical  
568 significance was calculated using one-way ANOVA and Dunnett's post-test using the wildtype  
569 parent strain as the control. \*\*\*\*,  $P < 0.0001$ ; \*\*\*,  $P < 0.001$ ; \*\*,  $P < 0.01$ ; ns, not statistically  
570 significant ( $P > 0.05$ ). (C) Fermentation products of *L. monocytogenes* strains grown in nutrient-  
571 rich media under aerobic conditions. Error bars show standard deviations. Results from three  
572 independent experiments are shown. ΔQC, Δ*qoxA*/Δ*cydAB*; ΔQC/*fmnB*,  
573 Δ*qoxA*/Δ*cydAB*/*fmnB*::tn; +NOX, strains complemented with *L. lactis* NOX.  
574  
575

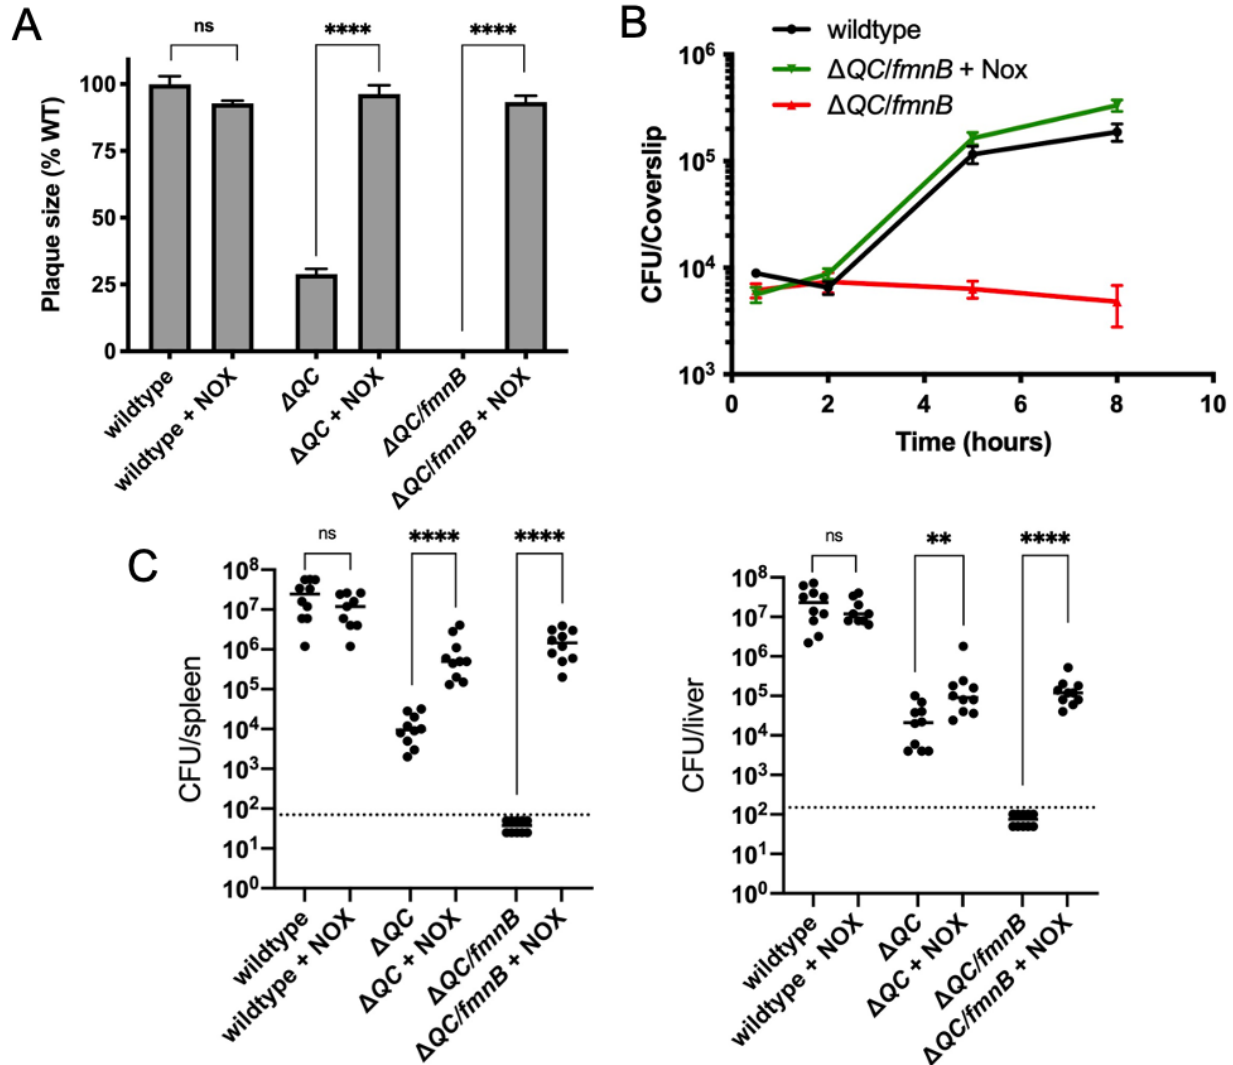

576  
 577 **Figure 4. NOX expression restores virulence to respiration-deficient *L. monocytogenes***  
 578 **strains.** (A) Plaque formation by cell-to-cell spread of *L. monocytogenes* strains in monolayers  
 579 of mouse L2 fibroblast cells. The mean plaque size of each strain is shown as a percentage  
 580 relative to the wildtype plaque size. Error bars represent standard deviations of the mean plaque  
 581 size from two independent experiments. Statistical analysis was performed using the unpaired  
 582 two-tailed *t* test. \*\*\*\*,  $P < 0.0001$ ; ns, no significant difference ( $P > 0.05$ ). (B) Intracellular growth  
 583 of *L. monocytogenes* strains in murine bone marrow-derived macrophages (BMMs). One hour  
 584 post-infection, infected BMMs were treated with 50  $\mu\text{g}/\text{mL}$  of gentamicin to kill extracellular  
 585 bacteria. Colony forming units (CFU) were enumerated at the indicated times. Results are  
 586 representative of three independent experiments. (C) Bacterial burdens in murine spleens and  
 587 livers 48 hours post-intravenous infection with indicated *L. monocytogenes* strains. The median  
 588 values of the CFUs are denoted by black bars. The dashed lines represent the limit of detection.  
 589 Data were combined from two independent experiments,  $n = 10$  mice per strain, but for the  
 590 wildtype + NOX strain ( $n = 9$  mice). Statistical significance was evaluated using the unpaired  
 591 two-tailed *t* test. \*\*\*\*,  $P < 0.0001$ ; \*\*,  $P < 0.01$ ; ns, no significant difference ( $P > 0.05$ ).  $\Delta\text{QC}$ ,  
 592  $\Delta\text{qoxA}/\Delta\text{cydAB}$ ;  $\Delta\text{QC}/\text{fmnB}$ ,  $\Delta\text{qoxA}/\Delta\text{cydAB}/\text{fmnB}::\text{tn}$ ; + NOX, strains complemented with *L.*  
 593 *lactis* NOX.  
 594

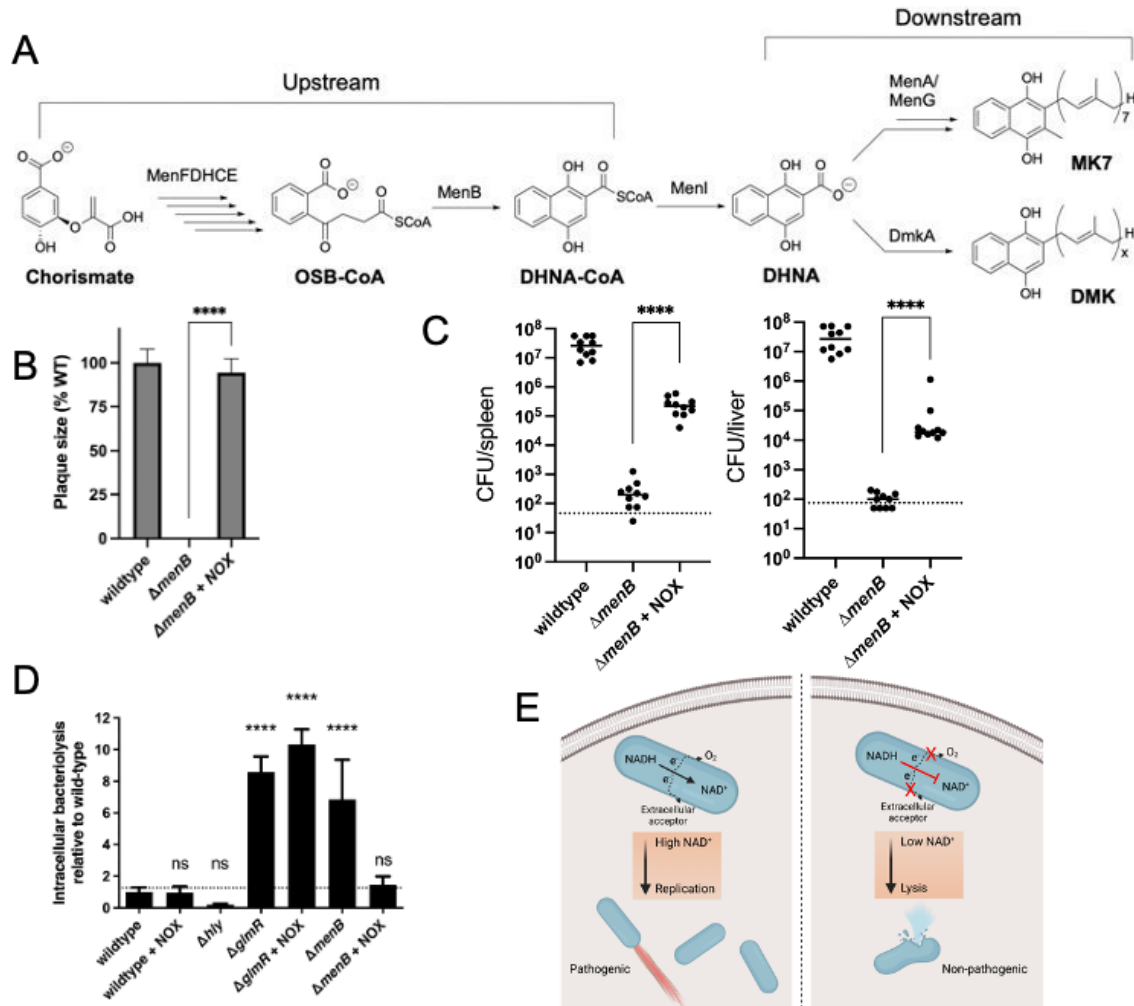

595  
 596 **Figure 5. Impaired redox homeostasis accounts for elevated bacteriolysis of a respiration-**  
 597 **deficient *L. monocytogenes* strain in the cytosol of infected cells.** (A) Proposed *L. monocytogenes*  
 598 quinone biosynthesis pathway. An unidentified demethylmenaquinone (DMK) is proposed to be required  
 599 for the flavin-based electron transfer pathway and MK7 required for aerobic respiration. Loss of the  
 600 upstream portion of the pathway is anticipated to impact both electron transport chains. (B) Plaque  
 601 formation by cell-to-cell spread of *L. monocytogenes* strains in monolayers of mouse L2 fibroblast cells.  
 602 The mean plaque size of each strain is shown as a percentage relative to the wildtype plaque size. Error  
 603 bars represent standard deviations of the mean plaque size from two independent experiments. Statistical  
 604 analysis was performed using the unpaired two-tailed *t* test. \*\*\*\*, *P* < 0.0001. (C) Bacterial burdens in  
 605 murine spleens and livers 48 hours post-intravenous infection with indicated *L. monocytogenes* strains.  
 606 The median values of the CFUs are denoted by black bars. The dashed lines represent the limit of  
 607 detection. Data were combined from two independent experiments, *n* = 10 mice per strain. Statistical  
 608 significance was evaluated using the unpaired two-tailed *t* test. \*\*\*\*, *P* < 0.0001. (D) Bacteriolysis of *L.*  
 609 *monocytogenes* strains in bone marrow-derived macrophages. The data are normalized to wildtype  
 610 bacteriolysis levels and presented as means and standard deviations from three independent  
 611 experiments. Statistical significance was calculated using one-way ANOVA and Dunnett's post-test using  
 612 the wildtype parent strain as the control. \*\*\*\*, *P* < 0.0001; ns, no significant difference (*P* > 0.05). (E)  
 613 Model of the role of respiration in *L. monocytogenes* pathogenesis. On the left, an intracellular bacterium  
 614 with the ability to oxidize NADH and transfer electrons through the aerobic and EET electron transport  
 615 chains can regenerate and maintain high NAD<sup>+</sup> levels which allows the bacterium to grow and be virulent.  
 616 On the right, an intracellular bacterium unable to regenerate NAD<sup>+</sup>, by lacking electron transport chains, is  
 617 avirulent because it lyses in the cytosol of infected cells.  
 618

**Table 1. Bacterial strains used in this study**

| Strains                                        | Strain number | Reference  |
|------------------------------------------------|---------------|------------|
| <i>L. monocytogenes</i> (wildtype)             | 10403S        | 1          |
| $\Delta cydAB/\Delta qoxA$                     | DP-L6624      | 2          |
| <i>fmnB::tn</i>                                | DP-L6612      | 3          |
| $\Delta cydAB/\Delta qoxA/fmnB::tn$            | DP-L7190      | This study |
| $\Delta fmnB::tn$                              | DP-L7195      | This study |
| Wildtype + pPL2-NOX                            | DP-L7188      | This study |
| $\Delta cydAB/\Delta qoxA$ + pPL2-NOX          | DP-L7189      | This study |
| $\Delta cydAB/\Delta qoxA/fmnB::tn$ + pPL2-NOX | DP-L7191      | This study |
| <i>Escherichia coli</i>                        | SM10          |            |
| NOX-pPL2                                       | DP-E7206      | This study |

1. Becavin, C. et al. Comparison of widely used *Listeria monocytogenes* strains EGD, 10403S, and EGD-e highlights genomic variations underlying differences in pathogenicity. *MBio* 5, e00969-00914, doi:10.1128/mBio.00969-14 (2014).

2. Chen, G. Y., McDougal, C. E., D'Antonio, M. A., Portman, J. L. & Sauer, J. D. A Genetic Screen Reveals that Synthesis of 1,4-Dihydroxy-2-Naphthoate (DHNA), but Not Full-Length Menaquinone, Is Required for *Listeria monocytogenes* Cytosolic Survival. *MBio* 8, doi:10.1128/mBio.00119-17 (2017).

3. Light SH, Su L, Rivera-Lugo R, Cornejo JA, Louie A, Iavarone AT, Ajo-Franklin CM, Portnoy DA. A flavin-based extracellular electron transfer mechanism in diverse Gram-positive bacteria. *Nature*. 2018 Oct;562(7725):140-144. doi: 10.1038/s41586-018-0498-z.
